# Supplementary material for: GlutenSpA trial: protocol for a randomised double-blind placebo-controlled trial of the impact of a gluten-free diet on quality of life in patients with axial spondyloarthritis
Source: PubMed Central journal article supplement — BMJ Open. 2020 Nov 20;10(11):e038715. doi: 10.1136/bmjopen-2020-038715 (PMC7682451; doi:10.1136/bmjopen-2020-038715), 2020-11-20
Supplement: bmjopen-2020-038715supp001.pdf [file bmjopen-2020-038715supp001.pdf]

## Formulaire de consentement de participation à une recherche impliquant la personne humaine

### *Impact d'un régime sans gluten sur la qualité de vie des patients ayant une spondyloarthrite axiale*

Je soussigné(e)

M<sup>me</sup>, M<sup>lle</sup>, M. (*ayer les mentions inutiles*) (*nom, prénom*).....

Né(e) le .....

Demeurant.....

Déclare :

- que le Docteur (*nom, prénom, téléphone*) ..... m'a proposé de participer à l'étude sus nommée,
- qu'il m'a expliqué en détail le protocole,
- qu'il m'a notamment fait connaître :
  - l'objectif, la méthode et la durée de l'étude
  - les contraintes et les risques potentiels encourus
  - mon droit de refuser de participer et en cas de désaccord de retirer mon consentement à tout moment
  - mon obligation d'inscription à un régime de sécurité sociale
  - que, si je le souhaite, à son terme, je serais informé(e) par le médecin investigateur de ses résultats globaux
  - que je ne serais pas autorisé(e) à participer à d'autres études cliniques pendant une durée de 24 semaines.
  - que le Comité de Protection des Personnes Nord Ouest IV a émis un avis favorable en date du 24/10/2019
  - que dans le cadre de cette étude le promoteur, le CHU de Clermont-Ferrand, a souscrit à une assurance couvrant cette recherche.
- que j'ai répondu en toute bonne foi aux questions concernant mon état de santé et ma participation à d'autres études,
- que je ne suis pas placé sous sauvegarde de justice.

Les informations relatives à l'étude recueillies par l'investigateur sont traitées confidentiellement. J'accepte que les données enregistrées à l'occasion de cette recherche puissent faire l'objet d'un traitement informatisé sans mention du nom ou du prénom. J'ai bien noté que les droits d'accès, de rectification, d'opposition et de limitation du traitement des données prévus par la loi du 20 juin 2018 relative à la protection des données personnelles s'exercent à tout moment auprès du médecin qui me suit dans le cadre de la recherche et qui connaît mon identité ou du délégué de protection des données du promoteur dont les coordonnées sont mentionnées dans la note d'information qui m'a été remise.

**Après avoir discuté librement et obtenu réponse à toutes mes questions, j'accepte librement et volontairement de participer à cette recherche impliquant la personne humaine dans les conditions précisées dans le formulaire d'information et de consentement**

☐ Je donne mon accord pour que les prélèvements biologiques effectués sur moi soient conservés et utilisés pour toutes autres études ancillaires portant sur les rhumatismes inflammatoires.

☐ Je m'oppose à ce que les prélèvements biologiques effectués sur moi soient conservés et utilisés pour toutes autres études ancillaires portant sur les rhumatismes inflammatoires.

**INVESTIGATEUR**

Nom et Prénom, date et signature

-----

Le ...../...../.....

Signature :

**PATIENT**

Nom et Prénom, date et signature

Précédée de la mention « lu et compris»

-----

Le. ..../...../.....

Signature :

*Ce document est à réaliser en 3 exemplaires originaux, dont le premier doit être gardé 15 ans par l'investigateur, un autre remis à la personne donnant son consentement et le troisième transmis au promoteur.*
